# Supplementary material for: Refined analyses suggest that recombination is a minor source of genomic diversity in Pseudomonas aeruginosa chronic cystic fibrosis infections
Source: PubMed Central journal article supplement (PMC5320575; doi:10.1099/mgen.0.000051), 2016-03-02
Supplement: mgen-02-51-s001.pdf [file mgen-02-51-s001.pdf]

1  
2  
3  
4  
5  
6  
7  
8  
9  
10  
11  
12  
13  
14  
15  
16  
17  
18  
19  
20  
21  
22  
23  
24  
25  
26  
27  
28  
29  
30  
31  
32  
33  
34  
35  
36

Supplementary Materials for:

## Refined analyses suggest recombination is a minor source of genomic diversity in *Pseudomonas aeruginosa* chronic cystic fibrosis infections.

### METHODS

#### Short Read Preparation

Preprocessing of short read data was implemented in the PrepareReads module of BAGA. Large FASTQ read files were subsampled to provide a 80x read coverage for mapping to a 6.6 Mb genome. Reads were trimmed using position-specific quality scores with Sickle ver. 1.33 (Joshi & Fass 2011) . Adaptor sequences from library preparation were removed using Cutadapt ver. 1.9.dev0 (Martin 2011) .

#### Short Read Alignment to reference genome

Short read alignment was implemented in the AlignReads module of BAGA. Paired end short reads were aligned to the LESB58 reference genome sequences with the MEM algorithm of BWA (Li & Durbin 2009) (github.com repository revision 9812521) estimating insert size from the data for designation of “proper pair” reads. SAMTools (github.com repository revision b0525f3) (Li et al. 2009) was used for conversion of SAM to BAM files and BAM file sorting. Duplicate reads were removed from alignments using Picard version1.135. The IndelRealigner module of the Genome Analysis Toolkit (GATK) (McKenna et al. 2010; DePristo et al. 2011) was used to simultaneously re-align reads that were likely to be near insertions or deletions.

#### Reference genome repetitive region variant filter

The algorithm for identifying reference genome repeat regions in which variants were deemed unreliable and omitted was implemented in the Repeats module of BAGA. First, each open reading frame nucleotide sequence in the published annotation was aligned back to the full LESB58 chromosome sequence using BWA MEM lowering alignment stringency by setting mismatch penalty to 2 and gap open penalty to 3. These initial alignments using BWA are used to seed an alignment procedure that uses optimal global (Needleman-Wunsch) alignment for better accuracy. The lower alignment stringency produces alignments more divergent than the target 98% nucleotide identity. After omitting alignments between the same sequences, the resulting collection of ORFs within

37 repeat regions were organised into contiguous blocks of homologous sequence. Each pair of  
38 homologous sequences, which may now contain more than one pair of ORFs, were aligned using the  
39 Needleman-Wunsch optimal global alignment algorithm implemented in the seq-align package  
40 ([github.com/noporpoise/seq-align](https://github.com/noporpoise/seq-align) revision 0589383). The percent identity between the two aligned  
41 regions is calculated within each 100 bp window at 20 bp increments along a pairwise alignment and  
42 regions with more than 98% nucleotide sequence identity were deemed similar enough to yield  
43 ambiguous read alignments. Regions greater than the mean insert size are retained for filtering  
44 because smaller regions are expected to be resolved by the relative positions of paired-end reads.

### 45 **Genome rearrangements variant filter**

46 This algorithm was implemented in the Structure module of BAGA and is applied on a per sample  
47 basis. The threshold for the ratio of reads not in a proper pair, to those in a proper pair, which when  
48 exceeded defines regions in which variant calls should be omitted, was set to 0.15. At this threshold,  
49 false positive variants in the simulations where large deletions were added were successfully filtered  
50 out. This ratio, collected at each position in the reference genome, is “smoothed” by averaging over a  
51 500 bp moving window. Proper pair status was determined by the BWA MEM aligner and was  
52 acquired from BAM files using PySAM version 0.8.3. Each region for variant omission was extended in  
53 each direction if a moving window equal to the mean insert size had at least 15% without any aligned  
54 reads. Plotting is implemented in the Structure module.

55

### 56 **Variant calling**

57 Variant calling was implemented in the CallVariants module of BAGA which follows the “Best Practices  
58 workflow” provided by the developers of GATK (Van der Auwera et al. 2013)  
59 (<https://www.broadinstitute.org/gatk/guide/best-practices> accessed 15/04/2015). SNPs and indels  
60 were called simultaneously via local re-assembly of haplotypes using the HaplotypeCaller module of  
61 the GATK setting `-sample_ploidy` to 1, `-heterozygosity` to 0.0001 and `-indel_heterozygosity` to  
62 0.00001 to approximate the 100-1400 SNPs in the 6.6Mb genomes reported by Williams et al. (2015)  
63 and Darch et al. (2015) and the ten-fold few indels reported by Williams et al. (2015). The two  
64 datasets were called in separate joint analyses. The standard GATK hard filters for SNPs and indels  
65 were applied. Base quality scores in BAM files were recalibrated.

### 66 **Population structure analysis**

67 The following procedures were implemented in the ComparativeAnalysis module of the BAGA. A  
68 multiple sequence alignment including the reference genome and all isolates was generated from the  
69 called SNPs with all filters applied. Invariant positions were retained and columns with missing data  
70 were included except if missing in all samples. For example, all 22 Nottingham samples are missing  
71 LESB58 Genomic Island 5 which is 50 kb long. A pair of polymorphisms 50 bases either side of the  
72 insertion site of Genomic Island 5 should be considered 100 bases apart in the 22 sampled genomes,  
73 not 50,100 bases apart, as it is only in the reference genome. Maximum likelihood phylogenetic  
74 reconstruction was performed using PhyML ([github.com/stephaneguindon/phyml](https://github.com/stephaneguindon/phyml) revision e71c553)  
75 (Guindon et al. 2010) using the default settings. Recombination was inferred using ClonalFrameML

76 (github.com/xavierdidelot/ClonalFrameML revision 2d793a3) (Didelot & Wilson 2015) using the  
77 PhyML phylogeny and -ignore\_incomplete\_sites true. Plotting including mapping the alignment  
78 positions reported by ClonalFrameML back to the reference genome is implemented in the  
79 ComparativeAnalysis module of BAGA. Phylogeny manipulations were performed using DendroPy  
80 4.0.3 (Sukumaran & Holder 2010). Further detection of recombination events, not implemented in  
81 BAGA, was performed using BRAT NextGen version 4/18/2011(Marttinen et al. 2012) with 100  
82 iterations to achieve negligible changes in model parameter estimates over the last 50 iterations. A  
83 threshold of 5% applied to 100 permutations was used for significance testing of each event.

## 84 **In silico read generation**

85 Ten sets of paired reads were generated from the LESB58 reference sequence using GemSim version  
86 1.6 (McElroy et al. 2012) and modelling the error profile of the Illumina GA IIx with Illumina  
87 Sequencing Kit v4 chemistry. Read length was 100 bp, with insert size 350 bp and standard deviation  
88 20. To provide 60x coverage depth, 1,980,527 read pairs were generated. Each set of reads was  
89 generated from a reference sequence on which 50 SNPs (30 shared with ~20 additionally selected at  
90 random to approximate a tree-like distribution) and 15 insertions and deletions (five shared, 10  
91 genome specific) had been applied *in silico*. These simulated reads can be reproduced using the  
92 SimulateReads module of BAGA and the scripts provided in the figshare  
93 repository(<http://dx.doi.org/10.6084/m9.figshare.2056365>). The read data was then analysed with  
94 the BAGA pipeline described above.

95

## 96 **Region-specific de novo assembly of reads for SNP validation**

97 For each isolate read set, at each SNP position, reads mapping to 5000 bp each side were extracted  
98 from BAM files using pySAM. These were combined with the unmapped and poorly mapped reads for  
99 de novo assembly using SPAdes. By reducing the total reads per assembly we aimed to decrease  
100 assembly complexity and increase accuracy. A set of contigs were also assembled from just the  
101 unmapped and poorly mapped reads and subtracted from the contigs of each SNP-associated  
102 assembly to leave those contigs relevant to that region. These remaining contigs were pairwise  
103 aligned to the region using the optimal global Needleman-Wunsch algorithm implemented in  
104 Seqalign. The pairwise alignment was then check for the presence or absence of the SNP.

105

## 106 **RESULTS AND DISCUSSION**

107

### 108 **Impact of reference genome repeats on variant calling**

109

110 In the present analysis, two novel filters were applied to mitigate false positive errors. For each filter,  
111 variants were omitted if called in regions where assumptions of the method were likely to be violated:  
112 either within long repeats in the reference sequence, or near break-points at rearrangements  
113 between a sample and the reference. Calling variants by mapping whole-genome shotgun reads to a  
114 reference genome assumes each gene sequence in the sampled individual must have a unique

115 equivalent in the reference. This 1-to-1 relationship means that each read will align unambiguously to  
116 the position in the reference genome that is positionally orthologous to the read origin in the sampled  
117 genome. If a read is aligned to the wrong (non-orthologous) part of a reference genome, false positive  
118 variants calls are likely.

119

120 The first novel variant filter in this analysis omitted variants in long repeats in the reference sequence.  
121 Sequence repeats can be caused by duplications (paralogy) or horizontally acquired DNA incorporated  
122 into a chromosome whilst also being homologous to another part of the chromosome. The Burrow-  
123 Wheeler Aligner used in this analysis reports an alignment quality of zero where a read maps perfectly  
124 to two parts of a genome. In these cases, the risk of false positive variants is easily mitigated by  
125 excluding reads with an alignment quality of zero. However, these zero alignment qualities will not be  
126 reported for slightly divergent repeats, which would be the case when one or more substitutions have  
127 occurred at one repeat unit but not another.

128

129 The algorithm we developed to identify repeat regions was implemented in the Repeats module of  
130 the Bacterial and Archaeal Genome Analyser (BAGA). Of the 6.6 Mb LESB58 reference genome,  
131 75.1 kb of chromosome in 35 regions were deemed repetitive. These regions required at least 98%  
132 aligned nucleotide identity and a length greater than the mean sequencing library insert size because  
133 smaller regions are expected to be resolved by the relative positions of paired-end reads. Only  
134 contiguous repeat regions, tandem or otherwise, longer than the insert size used in library  
135 preparation were included in the filter because shorter regions should be resolvable as unique. Of the  
136 42.7 kb in previously described long duplications in LESB58 (Winstanley et al. 2009), 23.0 kb were  
137 included in the high identity regions reported here. Among the Nottingham data, eight SNPs within  
138 these regions were omitted (Table S2). In the Liverpool data, nine SNPs were omitted. No indels were  
139 found in these regions.

140

141

## 142 **Impact of genome sequence rearrangements on variant calling**

143 The second novel variant filter used in this analysis omitted variants in regions around break-points of  
144 chromosomal rearrangements. The assumed 1-to-1 orthology required for variant calls from aligned  
145 reads can be violated at the regions bordering rearrangements between a sample and the reference  
146 genome. These structural changes in bacteria include large deletions, inversions, duplications and  
147 integrations, the last typically caused by acquisition of prophage or genomic islands. Some phage are  
148 known to carry a fragments of tRNA genes with homology to those in the host organism and  
149 integration involves replacement of parts the host version of a tRNA gene with the phage version  
150 (Campbell 1992) . Thus, regions flanking the resulting prophage may have sequence divergence  
151 caused by a more complex history than the simple orthology assumed by the read mapping method  
152 with an increased risk of artefactual, false-positive variants.

153

154 The algorithm we developed for omitting putatively unreliable variants near regions of structural  
155 rearrangements was implemented in the Structure module of the BAGA software package. The  
156 algorithm exploits the fact that sequence reads in this analysis were “paired-end”: from either end of  
157 many template DNA fragments of similar lengths. The Burrows-Wheeler Aligner used in this analysis  
158 assigns a read “proper pair” status if the aligned distance and orientation to its paired read is close to  
159 that expected given the mean template DNA fragment length. Paired-end reads on either side of a  
160 rearrangement break-point typically align to the reference at distances far greater than the fragment  
161 lengths or in different orientations. For example, in many samples, no reads mapped to the LESB58  
162 chromosome region annotated as “LES prophage 5” indicating absence of the prophage in those  
163 samples. Paired reads would align kilobases apart on either side of the prophage if they originated  
164 from a DNA fragment spanning the orthologous site of prophage integration, in a sample lacking the  
165 prophage. These reads would not be assigned “proper pair” status being so much further apart than  
166 the mean fragment size.

167

168 Fig. 3 illustrates how our algorithm determines regions near genome rearrangements in which variant  
169 calls may be unreliable. In this example the rearrangement is a duplication, but other common  
170 rearrangements include the loss or gain of a prophage or other genomic island. These regions are  
171 defined by a deviation in the ratio of proper-pair-assigned reads to non-proper-pair-assigned reads:  
172 the more non-proper-pair-assigned reads, the less reliable the region. The initially selected region is  
173 extended while regions of the reference have zero aligned read coverage and variants called within  
174 the combined region are omitted. In the Nottingham data, 33 SNPs and 10 indels within these regions  
175 were omitted (Table S2). In the Liverpool data, 39 SNPs and eight indels were omitted. This analytic  
176 approach, by accounting for potential false positive variant calls caused by missing regions of  
177 chromosome, is of value because turnover of prophage and genomic islands among microbial  
178 genomes is often rapid(Wilmes et al. 2009). In many cases, including the analyses of the Liverpool and  
179 Nottingham datasets, guaranteeing a similar genomic composition to permit a contiguous alignment  
180 between reference and sampled genomes is difficult. Prophage and genomic islands and are  
181 abundant throughout Bacteria and Archaea(Zhou et al. 2011)so few read mapping analyses will be  
182 unaffected by these challenges.

183

## 184 TABLES

185

186 Table S1: Small insertions and deletions predicted to cause frame-shift mutations among the Nottingham isolates

| Chromosome  | Position (bp) | Reference                                                          | Variant                                                            | Gene ID      | Gene name | Frequency | Frequency (filtered) |
|-------------|---------------|--------------------------------------------------------------------|--------------------------------------------------------------------|--------------|-----------|-----------|----------------------|
| NC_011770.1 | 14914         | T                                                                  | TGC                                                                | PLES_RS00075 |           | 10        | 10                   |
| NC_011770.1 | 335247        | C                                                                  | CG                                                                 | PLES_RS01530 |           | 2         | 2                    |
| NC_011770.1 | 467972        | GATCCTCCTCGT                                                       | G                                                                  | PLES_RS02170 | mexB      | 22        | 22                   |
| NC_011770.1 | 1037925       | A                                                                  | AC                                                                 | PLES_RS05000 | mpl       | 3         | 3                    |
| NC_011770.1 | 1267074       | CCCCTGGAGCT                                                        | C                                                                  | PLES_RS06070 |           | 3         | 3                    |
| NC_011770.1 | 2532081       | G                                                                  | GT                                                                 | PLES_RS12255 |           | 1         | 0                    |
| NC_011770.1 | 2639073       | AG                                                                 | A                                                                  | PLES_RS12750 |           | 1         | 1                    |
| NC_011770.1 | 3280614       | A                                                                  | AAGCGCGCGACC<br>CGGAAGCCGTTG<br>CCCAGCGGGGCG<br>CCCTGT             | PLES_RS15460 |           | 1         | 0                    |
| NC_011770.1 | 3378367       | AG                                                                 | A                                                                  | PLES_RS15875 | pslJ      | 21        | 21                   |
| NC_011770.1 | 3388596       | GTACTTGCCGCT<br>GTCCAGGTAGGA<br>CTGGGCGGTGGC<br>CTGGTCGGGTTT<br>CT | G                                                                  | PLES_RS15915 | pslB      | 1         | 0                    |
| NC_011770.1 | 3484676       | CGCCCGAGCAA                                                        | C                                                                  | PLES_RS16380 |           | 22        | 22                   |
| NC_011770.1 | 3898444       | C                                                                  | CACGATTCGTTG<br>TCAAAAATAGCC<br>AAGGACCCGGAC<br>ACACGCCTGATG<br>CG | PLES_RS18160 | mltD      | 1         | 1                    |
| NC_011770.1 | 4044433       | C                                                                  | CGG                                                                | PLES_RS18915 | stk1      | 1         | 1                    |

|             |         |                       |                        |              |      |    |    |
|-------------|---------|-----------------------|------------------------|--------------|------|----|----|
| NC_011770.1 | 4931526 | G                     | GGGGATGTCGAC<br>ATGCAA | PLES_RS23105 |      | 2  | 0  |
| NC_011770.1 | 5398560 | TCG                   | T                      | PLES_RS25200 | ampD | 22 | 22 |
| NC_011770.1 | 5903286 | GCT                   | G                      | PLES_RS27535 |      | 22 | 22 |
| NC_011770.1 | 6060546 | C                     | CAT                    | PLES_RS28165 |      | 22 | 22 |
| NC_011770.1 | 6557920 | GTGGCGTTCGGC<br>GCAGT | G                      | PLES_RS30445 |      | 22 | 22 |

187

188 Table S2: Total polymorphisms called for the Liverpool and Nottingham datasets as cumulative filters are applied, divided by type

| Cumulative filters applied                 | Liverpool         |                     | Nottingham |        | All data |        |
|--------------------------------------------|-------------------|---------------------|------------|--------|----------|--------|
|                                            | SNPs <sup>*</sup> | Indels <sup>†</sup> | SNPs       | Indels | SNPs     | Indels |
| None                                       | 318               | 68                  | 170        | 47     | 440      | 89     |
| GATK <sup>‡</sup> standard 'hard' filter   | 318               | 68                  | 170        | 47     | 440      | 89     |
| BAGA <sup>§</sup> reference genome repeats | 309               | 68                  | 162        | 47     | 424      | 89     |
| BAGA genome rearrangements                 | 270               | 60                  | 129        | 37     | 364      | 78     |

189 \*Single nucleotide polymorphisms; †Small insertion or deletion polymorphisms; ‡Genome Analysis Toolkit; §Bacterial and Archaeal  
190 Genome Analyser

191

192 Table S3: Polymorphisms called as fixed in samples and differing with reference for the Liverpool and Nottingham datasets as cumulative  
193 filters are applied, divided by type

| Cumulative filters applied                 | Liverpool         |                     | Nottingham |        | All data |        |
|--------------------------------------------|-------------------|---------------------|------------|--------|----------|--------|
|                                            | SNPs <sup>*</sup> | Indels <sup>†</sup> | SNPs       | Indels | SNPs     | Indels |
| None                                       | 43                | 5                   | 101        | 17     | 113      | 21     |
| GATK <sup>‡</sup> standard 'hard' filter   | 43                | 5                   | 101        | 17     | 113      | 21     |
| BAGA <sup>§</sup> reference genome repeats | 43                | 5                   | 99         | 17     | 111      | 21     |

BAGA genome rearrangements      43      5      92      15      104      19

194 \*Single nucleotide polymorphisms; †Small insertion or deletion polymorphisms; ‡Genome Analysis Toolkit; §Bacterial and Archaeal  
 195 Genome Analyser

196

197 Table S4: Polymorphisms called among the Liverpool and Nottingham datasets as cumulative filters are applied, divided by type

| Cumulative filters applied                 | Liverpool         |                     | Nottingham |        | All data |        |
|--------------------------------------------|-------------------|---------------------|------------|--------|----------|--------|
|                                            | SNPs <sup>*</sup> | Indels <sup>†</sup> | SNPs       | Indels | SNPs     | Indels |
| None                                       | 275               | 63                  | 69         | 30     | 337      | 71     |
| GATK <sup>‡</sup> standard 'hard' filter   | 275               | 63                  | 69         | 30     | 337      | 71     |
| BAGA <sup>§</sup> reference genome repeats | 266               | 63                  | 63         | 30     | 322      | 71     |
| BAGA genome rearrangements                 | 227               | 55                  | 37         | 22     | 264      | 60     |

198 \*Single nucleotide polymorphisms; †Small insertion or deletion polymorphisms; ‡Genome Analysis Toolkit; §Bacterial and Archaeal  
 199 Genome Analyser

200

201 Table S5: Proportion of single nucleotide polymorphisms called by the GATK Haplotype Caller recovered in de novo assembled contigs.

202

| Sample | Proportion all variants corroborated | Proportion filtered variants corroborated* |
|--------|--------------------------------------|--------------------------------------------|
| SED01  | 96.83%                               | 100.00%                                    |
| SED02  | 92.56%                               | 96.00%                                     |
| SED03  | 97.54%                               | 100.00%                                    |
| SED04  | 95.97%                               | 100.00%                                    |
| SED05  | 92.48%                               | 98.04%                                     |
| SED06  | 94.92%                               | 100.00%                                    |
| SED07  | 91.41%                               | 97.94%                                     |
| SED08  | 93.75%                               | 97.98%                                     |
| SED09  | 92.48%                               | 99.02%                                     |



|       |        |         |
|-------|--------|---------|
| SED10 | 94.26% | 97.96%  |
| SED11 | 89.84% | 97.96%  |
| SED12 | 93.10% | 96.94%  |
| SED13 | 88.10% | 100.00% |
| SED14 | 94.40% | 100.00% |
| SED15 | 91.41% | 97.96%  |
| SED16 | 93.75% | 99.00%  |
| SED17 | 94.49% | 100.00% |
| SED18 | 95.31% | 100.00% |
| SED19 | 92.91% | 97.98%  |
| SED20 | 92.11% | 96.94%  |
| SED21 | 95.97% | 98.98%  |
| SED22 | 96.09% | 100.00% |

203 \*Most of the variants removed by the novel filters were not present in the *de novo* assemblies

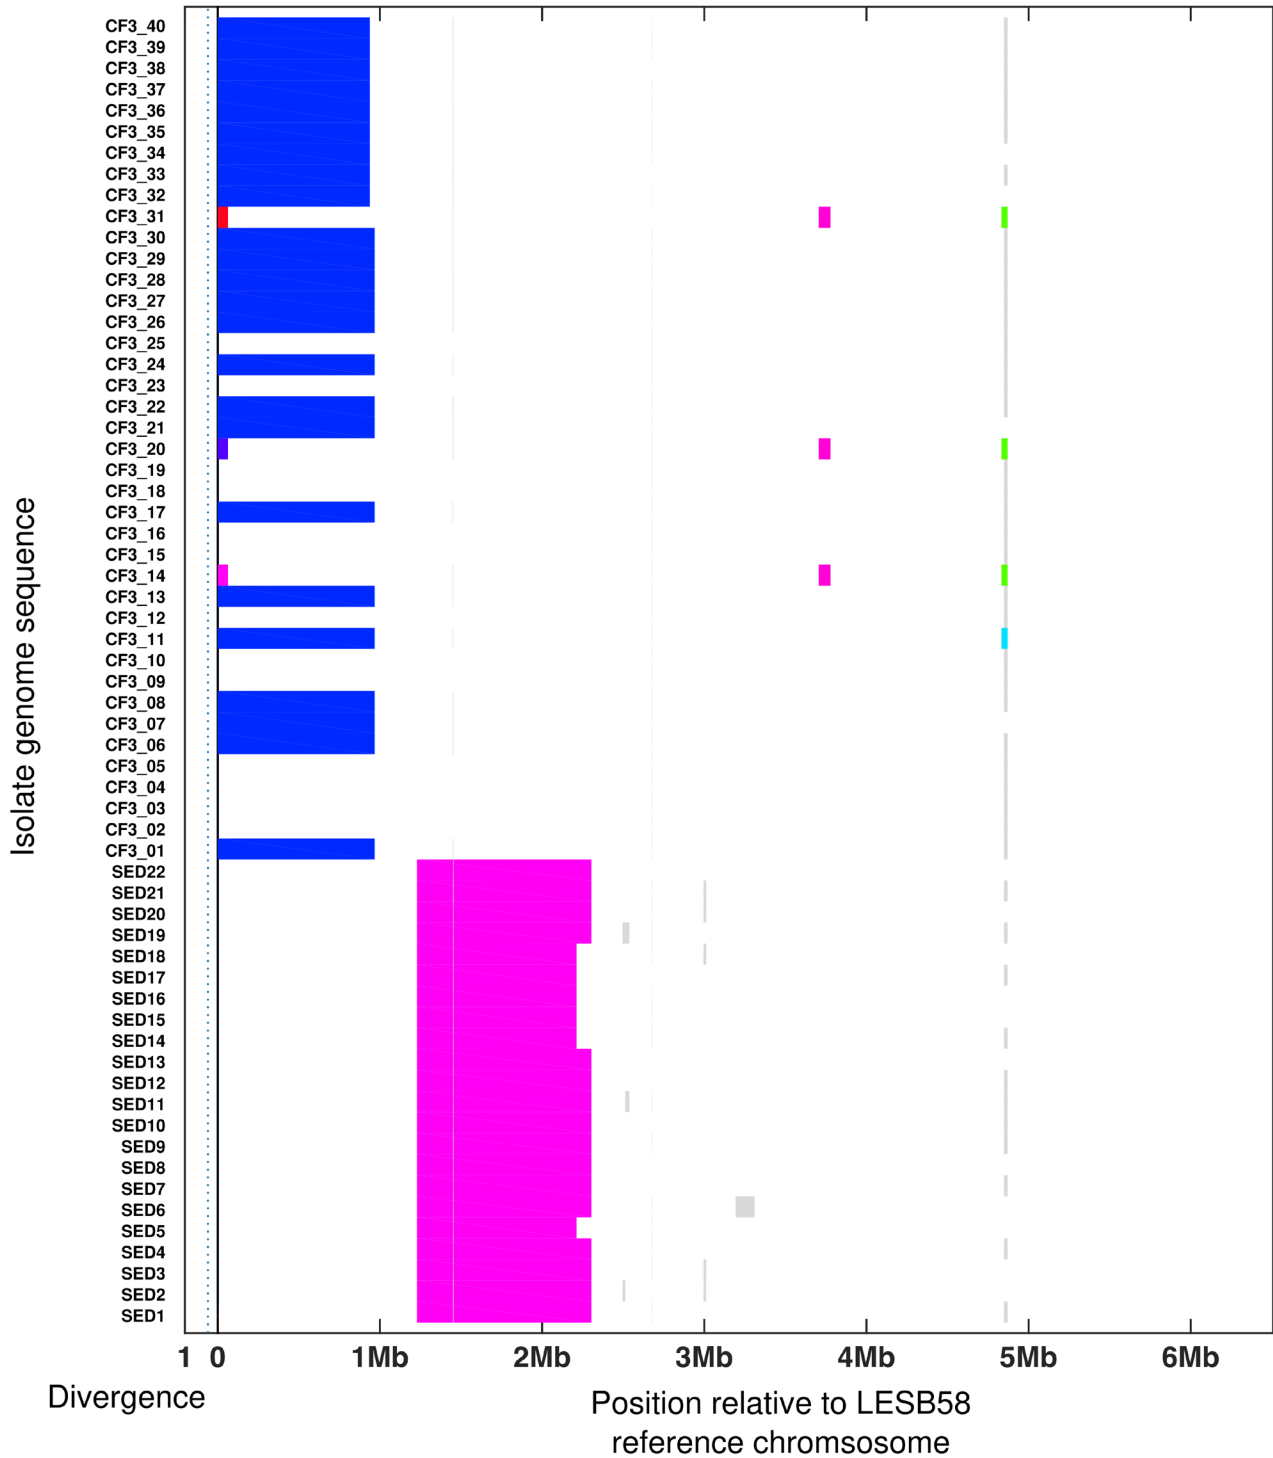

205

206

207 Figure S1. Segments of chromosome indicated by coloured bars, among the Liverpool and Nottingham  
 208 isolates, inferred to have undergone homologous recombination. Regions that are the same colour

209 share a common origin whereas grey regions were not deemed significant in a permutation test at  
210  $\alpha = 0.05$ .  
211

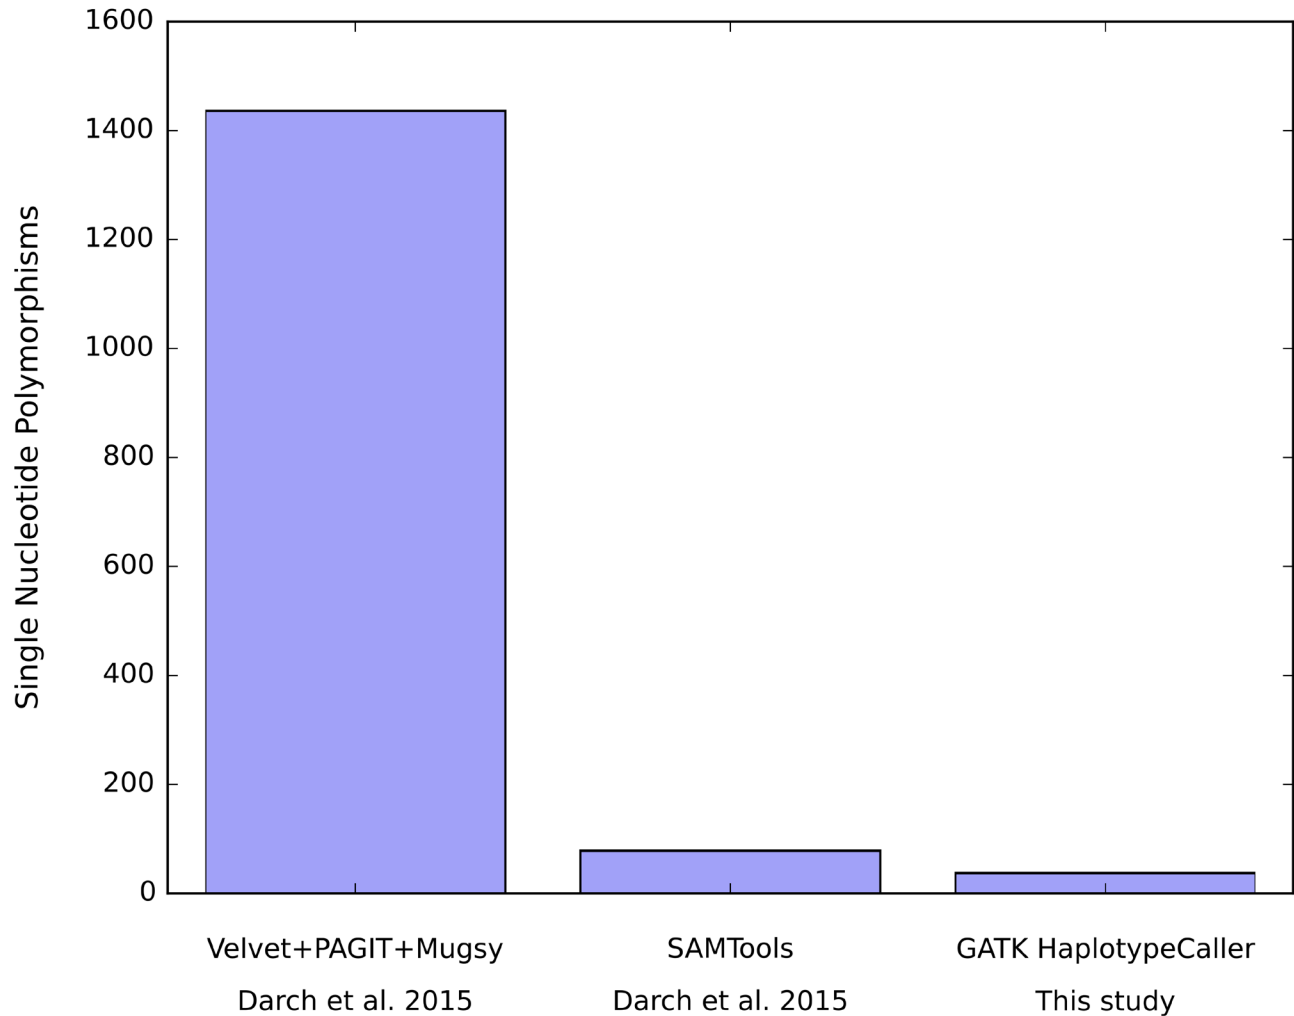

212  
213 Figure S2. Total single nucleotide polymorphisms called by different methods from the same dataset.  
214 In the first method from a previously published analysis, short reads from 22 *P. aeruginosa* isolates  
215 were each assembled into contigs *de novo*, improved using an automated pipeline and finally  
216 combined into a multiple sequence alignment within which polymorphic positions were counted.  
217 In the second two methods one from the previous study and the third from this report, variants were  
218 called among short reads aligned against a complete reference sequence from a closely related isolate  
219 (*P. aeruginosa* LESB58).

220  
221

## 222 REFERENCES

223 Sickle: A sliding-window, adaptive, quality-based trimming tool for FastQ files (Version 1.29)  
224 [<https://github.com/najoshi/sickle>]

225 **Martin M. (2011)**. Cutadapt removes adapter sequences from high-throughput sequencing reads.  
226 *EMBnetjournal***17** 1.

227 **Li H., Durbin R. (2009)**. Fast and accurate short read alignment with Burrows–Wheeler transform.  
228 *Bioinformatics***25** 1754-1760.

229 **Li H., Handsaker B., Wysoker A., Fennell T., Ruan J., Homer N., Marth G., Abecasis G., Durbin R. (2009)**. The  
230 Sequence Alignment/Map format and SAMtools. *Bioinformatics***25** 2078-2079.

231 Picard Sequence Alignment/Map file manipulation library [<http://picard.sourceforge.net/>]

232 **McKenna A., Hanna M., Banks E., Sivachenko A., Cibulskis K., Kernytsky A., Garimella K., Altshuler D., Gabriel  
233 S., other authors (2010)**. The Genome Analysis Toolkit: A MapReduce framework for analyzing next-generation  
234 DNA sequencing data. *Genome Res***20** 1297-1303.

235 **DePristo M.A., Banks E., Poplin R., Garimella K.V., Maguire J.R., Hartl C., Philippakis A.A., del Angel G., Rivas  
236 M.A., other authors (2011)**. A framework for variation discovery and genotyping using next-generation DNA  
237 sequencing data. *Nat Genet***43** 491-498.

238 **Van der Auwera G.A., Carneiro M.O., Hartl C., Poplin R., del Angel G., Levy-Moonshine A., Jordan T., Shakir  
239 K., Roazen D., other authors (2013)**. From FastQ Data to High-Confidence Variant Calls: The Genome Analysis  
240 Toolkit Best Practices Pipeline. *Curr Protoc Bioinform***43** 11.10.1-11.10.33.

241 **Guindon S., Dufayard J., Lefort V., Anisimova M., Hordijk W., O. G. (2010)**. New algorithms and methods to  
242 estimate maximum-likelihood phylogenies: assessing the performance of PhyML 3.0. *Syst Biol***59** 307-21.

243 **Didelot X., Wilson D.J. (2015)**. ClonalFrameML: Efficient Inference of Recombination in Whole Bacterial  
244 Genomes. *PLoS Comput Biol***11** e1004041-.

245 **Sukumaran J., Holder M.T. (2010)**. DendroPy: a Python library for phylogenetic computing. *Bioinformatics***26**  
246 1569-1571.

247 **McElroy K.E., Luciani F., Thomas T. (2012)**. GemSIM: general, error-model based simulator of next-generation  
248 sequencing data. *BMC Genomics***13** 74.

249 **Winstanley C., Langille M.G., Fothergill J.L., Kukavica-Ibrulj I., Paradis-Bleau C., Sanschagrín F., Thomson N.R.,  
250 Winsor G.L., Quail M.A., other authors (2009)**. Newly introduced genomic prophage islands are critical  
251 determinants of *in vivo* competitiveness in the Liverpool Epidemic Strain of *Pseudomonas aeruginosa*. *Genome  
252 Res***19** 12-23.

253 **Campbell A.M. (1992)**. Chromosomal insertion sites for phages and plasmids. *J Bacteriol***174** 7495-7499.

254 **Wilmes P., Simmons S.L., Denev V.J., Banfield J.F. (2009)**. The dynamic genetic repertoire of microbial  
255 communities. *FEMS Microbiol Rev***33** 109-132.

256 **Zhou Y., Liang Y., Lynch K.H., Dennis J.J., Wishart D.S. (2011)**. PHAST: A Fast Phage Search Tool. *Nucleic Acids  
257 Res***39** W347-W352.
